# Supplementary material
Source: publisher site journal article supplement (https://www.dovepress.com/article/supplementary_file/605993/605993%20Appendix%20Material.docx)
Supplement: Supplementary file 1 [file 605993%20Appendix%20Material.docx]

**Appendix A - Further Robustness Check**

Table A1 reports the results of the robustness check using confidence intervals. The numbers in brackets are the 95% confidence intervals for each DID coefficient. They show the range within which the true effect is likely to fall with 95% probability. If the interval excludes zero, the effect is statistically significant at the 0.05 level. For self-reported health [0.043, 0.223] and memory [0.030, 0.568], the intervals do not contain zero, indicating significant positive effects. For CES-D [−1.230, 0.214], the interval includes zero, meaning the effect is not statistically significant.

Table A1. Robustness Check: Using Confidence Intervals

|  | (1) | (2) | (3) |
| --- | --- | --- | --- |
| Variables | Self-Reported Health | Memory | CES-D |
| DID | 0.1334*** | 0.2988** | -0.5079 |
|  | (0.043 - 0.223) | (0.030 - 0.568) | (-1.230 - 0.214) |
| Age | -0.0480 | 0.0580 | -0.6913* |
|  | (-0.179 - 0.083) | (-0.338 - 0.454) | (-1.396 - 0.013) |
| Education Level | -0.0761 | 0.2022* | 0.2952 |
|  | (-0.246 - 0.093) | (-0.000 - 0.405) | (-0.512 - 1.102) |
| Marital Status | 0.1074*** | 0.3742*** | -1.2437*** |
|  | (0.033 - 0.181) | (0.196 - 0.552) | (-1.738 - -0.750) |
| Health Insurance | 0.0187 | 0.0809 | -0.3557* |
|  | (-0.040 - 0.077) | (-0.043 - 0.205) | (-0.713 - 0.001) |
| Pension Insurance | -0.0125 | -0.1060*** | -0.0690 |
|  | (-0.039 - 0.014) | (-0.180 - -0.032) | (-0.262 - 0.124) |
| Hukou | -0.0053 | 0.1956* | 0.5823* |
|  | (-0.089 - 0.078) | (-0.007 - 0.398) | (-0.098 - 1.263) |
| Consumption Level | -0.0000 | 0.0000 | 0.0000* |
|  | (-0.000 - 0.000) | (-0.000 - 0.000) | (-0.000 - 0.000) |
| Number of Children | 0.0050 | -0.0413 | 0.0607 |
|  | (-0.018 - 0.028) | (-0.091 - 0.009) | (-0.126 - 0.248) |
| Constant | 5.9972 | -0.6320 | 49.8452** |
|  | (-1.906 - 13.900) | (-24.266 - 23.002) | (7.465 - 92.225) |
| Observations | 35,805 | 31,310 | 34,458 |
| R-squared | 0.634 | 0.665 | 0.678 |
| Individual FE | YES | YES | YES |
| Year FE | YES | YES | YES |

Note: Confidence intervals are shown in parentheses and cluster-robust standard errors are clustered at city level. Asterisks reflect significance level: *** p<0.01, ** p<0.05, * p<0.1.

Given that healthcare expenditure data are typically right skewed. To address this concern, we log-transformed the cost variable and re-estimated the linear fixed effects model. The main conclusions remained unchanged. Thus, our choice of a linear fixed effects specification is justified, as the log transformation effectively mitigates the skewness issue while preserving the interpretation of within‑unit changes. Table A2 shows the robustness check using the logarithm of cost.

Table A2. Robustness Check: Using Logarithm of Cost

|  | (1) | (2) | (3) | (4) |
| --- | --- | --- | --- | --- |
| Variables | Inpatient Cost (log) | Outpatient Cost (log) | Inpatient Cost | Outpatient Cost |
| DID | -0.2717* | 0.1317 | -1,024.6733*** | -7.3821 |
|  | (0.1521) | (0.1842) | (309.4575) | (58.3133) |
| Age | 0.4091 | -0.0233 | 479.5655 | 212.9738 |
|  | (0.2678) | (0.2230) | (627.8938) | (170.1790) |
| Education Level | -0.0170 | 0.1480 | 925.5267 | 53.4175 |
|  | (0.1647) | (0.2012) | (1,240.5151) | (47.3838) |
| Marital Status | -0.4066*** | -0.2252** | -173.9895 | 23.8775 |
|  | (0.1261) | (0.1070) | (422.6819) | (79.2345) |
| Health Insurance | 0.2259*** | 0.1300* | 359.8203 | -29.9569 |
|  | (0.0744) | (0.0689) | (231.1863) | (71.8298) |
| Pension Insurance | 0.1205** | 0.0022 | 341.9213 | 11.8848 |
|  | (0.0487) | (0.0398) | (265.1178) | (32.2602) |
| Hukou | -0.2981 | 0.0182 | -396.3800 | 57.2239 |
|  | (0.2238) | (0.1054) | (530.3626) | (46.7584) |
| Consumption Level | 0.0000*** | 0.0000** | 0.0491*** | 0.0037** |
|  | (0.0000) | (0.0000) | (0.0173) | (0.0018) |
| Number of Children | 0.0084 | 0.0107 | -62.7565 | 10.0409 |
|  | (0.0408) | (0.0287) | (137.0999) | (25.0803) |
| Constant | -23.3188 | 2.1201 | -29,775.4485 | -12,835.2994 |
|  | (16.0777) | (13.3550) | (37,811.5583) | (10,238.1431) |
| Observations | 36,892 | 36,740 | 36,892 | 36,740 |
| R-squared | 0.466 | 0.463 | 0.455 | 0.416 |
| Individual FE | YES | YES | YES | YES |
| Year FE | YES | YES | YES | YES |

Note: Cluster-robust standard errors are shown in parentheses and are clustered at city level. Asterisks reflect significance level: *** p<0.01, ** p<0.05, * p<0.1.

Table A3. Types of Benefit Packages in Pilot Cities

| City | Eligibility Criteria | Cash Benefit | Financing (Public Health Insurance Fund Share) | Benefit Summary |
| --- | --- | --- | --- | --- |
| Shangrao | Severe disability | Yes | 30% | Hospital: 1080 RMB/month; Home care: 900 RMB/month; Self-nursing subsidy: 450 RMB/month |
| Chengdu | Severe disability | Yes | 25%–67% (age‑based) | Hospital/institution co-payment 30%; Home care co-payment 25% (both based on disability level) |
| Xuzhou | Severe disability | Yes | N/A | Hospital co-payment 40%; Institution co-payment 50%; Home care (contracted) cap 500 RMB/month; (non‑contracted) 15 RMB/day |
| Jingmen | Barthel ≤40 | Yes | 25% | Hospital co-payment 30% (cap 150/day); Institution co-payment 25% (cap 100/day); Home care co-payment 20% (cap 100/day) or 0% (cap 40/day) |
| Ningbo | Severe disability | No | N/A | Hospital: 40 RMB/day; Institution: 40 RMB/day |
| Jinan | Barthel ≤55 | No | N/A | Hospital: 220–260 RMB/day; Institution: 70 RMB/day; Home care: cap 60 RMB/hour, max 4 hours/day |
| Jilin | Barthel ≤40 | No | N/A | Institution co-payment 20% or 30% |
| Chengde | Barthel ≤40 | No | 50% | Co-payment 30% for hospital, institution, and home care |
| Shanghai | Age >60, disability level 2‑6 | No | 100% | Hospital co-payment 20%; Institution co-payment 15%; Home care co-payment 10% (hours vary by level) |
| Anqing | Barthel ≤40 | No | 67% | Hospital co-payment 40% (cap 50/day); Institution co-payment 50% (cap 40/day); Home care contracted cap 750/month |
| Guangzhou | Moderate/severe disability, dementia | No | 100% | Hospital co-payment 25% (cap 1000/month, daily cap 120/day); Home care co-payment 10% (cap 1000/month, daily cap 115/day) |
| Linyi | Barthel ≤55 | No | N/A | Hospital co-payment 15–25%; Institution co-payment 15%; Home care co-payment 10% |
| Qiqihar | Severe disability | No | 50% | Hospital co-payment 40%; Institution co-payment 45%; Home care co-payment 50% |
| Suzhou | Moderate/severe disability | No | 58% | Institution: severe 26 RMB/day, moderate 20 RMB/day; Home care: severe 30 RMB/day, moderate 25 RMB/day |
